# Supplementary material
Source: PubMed Central journal article supplement (PMC1941816)
Supplement: pnas_0611544104_1.pdf [file pnas_0611544104_1.pdf]

**Table 2. Allometric scaling of tracheal and exoskeletal structures (volume and cross-sectional areas) with body mass (mg) in four species of tenebrionid beetles ( $\log_{10} Y = \text{intercept} + \text{slope} \times \log_{10} \text{body mass}$ )**

| <b>A</b>                          | Standard major axis (1) line-fit on phylogenetically independent contrasts;<br>phylogenetic correction based on tree with all branch lengths set to one (2) |       |          |                          |                          |                   |                         |                         |
|-----------------------------------|-------------------------------------------------------------------------------------------------------------------------------------------------------------|-------|----------|--------------------------|--------------------------|-------------------|-------------------------|-------------------------|
|                                   | Slope                                                                                                                                                       | SE    | <i>r</i> | <i>t</i> <sub>Comp</sub> | <i>p</i> <sub>Comp</sub> | SI <sub>Hyp</sub> | <i>t</i> <sub>Hyp</sub> | <i>p</i> <sub>Hyp</sub> |
| Log tracheal volume, ml           | 1.294                                                                                                                                                       | 0.061 | 0.998    | 4.824                    | 0.040                    | 1                 | 5.861                   | 0.028                   |
| Log head orifice, mm <sup>2</sup> | 0.622                                                                                                                                                       | 0.024 | 0.999    | 1.842                    | 0.207                    | 0.67              | 2.381                   | 0.140                   |
| Log head trachea, mm <sup>2</sup> | 0.783                                                                                                                                                       | 0.040 | 0.997    | 2.909                    | 0.101                    | 0.67              | 2.972                   | 0.097                   |
| Log leg orifice, mm <sup>2</sup>  | 0.770                                                                                                                                                       | 0.062 | 0.993    | 1.670                    | 0.237                    | 0.67              | 1.651                   | 0.240                   |
| Log leg trachea, mm <sup>2</sup>  | 1.024                                                                                                                                                       | 0.024 | 0.999    | 15.140                   | 0.004                    | 0.67              | 20.20                   | 0.002                   |

| <b>B</b>                           | Standard major axis line-fit on phylogenetically independent contrasts;<br>phylogenetic correction based on tree of figure 51 ref. 3 |       |          |                          |                          |                   |                         |                         |
|------------------------------------|--------------------------------------------------------------------------------------------------------------------------------------|-------|----------|--------------------------|--------------------------|-------------------|-------------------------|-------------------------|
|                                    | Slope                                                                                                                                | SE    | <i>r</i> | <i>t</i> <sub>Comp</sub> | <i>p</i> <sub>Comp</sub> | SI <sub>Hyp</sub> | <i>t</i> <sub>Hyp</sub> | <i>p</i> <sub>Hyp</sub> |
| Log tracheal volume, ml            | 1.284                                                                                                                                | 0.060 | 0.998    | 0.120                    | 0.908                    | 1                 | 4.745                   | 0.042                   |
| Log head orifice, mm <sup>2</sup>  | 0.617                                                                                                                                | 0.024 | 0.998    | 0.153                    | 0.883                    | 0.67              | 2.029                   | 0.180                   |
| Log head trachea, mm <sup>2</sup>  | 0.772                                                                                                                                | 0.042 | 0.997    | 0.182                    | 0.862                    | 0.67              | 2.504                   | 0.129                   |
| Log leg orifice, mm <sup>2</sup>   | 0.754                                                                                                                                | 0.064 | 0.993    | 0.168                    | 0.872                    | 0.67              | 1.373                   | 0.303                   |
| Log leg trachea, mm <sup>2</sup> ) | 1.026                                                                                                                                | 0.023 | 0.9995   | 0.088                    | 0.933                    | 0.67              | 15.91                   | 0.004                   |

| <b>C</b>                          | Ordinary least-square regression on phylogenetically independent contrasts;<br>phylogenetic correction based on tree in Fig. 3 (see Table 1) |       |          |                          |                          |                   |                         |                         |
|-----------------------------------|----------------------------------------------------------------------------------------------------------------------------------------------|-------|----------|--------------------------|--------------------------|-------------------|-------------------------|-------------------------|
|                                   | Slope                                                                                                                                        | SE    | <i>r</i> | <i>t</i> <sub>Comp</sub> | <i>p</i> <sub>Comp</sub> | SI <sub>Hyp</sub> | <i>t</i> <sub>Hyp</sub> | <i>p</i> <sub>Hyp</sub> |
| Log tracheal volume, ml           | 1.291                                                                                                                                        | 0.061 | 0.998    | 0.033                    | 0.974                    | 1                 | 4.776                   | 0.041                   |
| Log head orifice, mm <sup>2</sup> | 0.621                                                                                                                                        | 0.024 | 0.999    | 0.027                    | 0.979                    | 0.67              | 1.881                   | 0.201                   |
| Log head trachea, mm <sup>2</sup> | 0.781                                                                                                                                        | 0.040 | 0.997    | 0.036                    | 0.972                    | 0.67              | 2.858                   | 0.104                   |
| Log leg orifice, mm <sup>2</sup>  | 0.765                                                                                                                                        | 0.062 | 0.993    | 0.057                    | 0.956                    | 0.67              | 1.589                   | 0.253                   |
| Log leg trachea, mm <sup>2</sup>  | 1.023                                                                                                                                        | 0.024 | 0.999    | 0.016                    | 0.988                    | 0.67              | 15.12                   | 0.004                   |

| <b>D</b>                          | Standard major axis line-fit on species mean values without phylogenetic<br>correction |       |          |                          |                          |                   |                         |                         |
|-----------------------------------|----------------------------------------------------------------------------------------|-------|----------|--------------------------|--------------------------|-------------------|-------------------------|-------------------------|
|                                   | Slope                                                                                  | SE    | <i>r</i> | <i>t</i> <sub>Comp</sub> | <i>p</i> <sub>Comp</sub> | SI <sub>Hyp</sub> | <i>t</i> <sub>Hyp</sub> | <i>p</i> <sub>Hyp</sub> |
| Log tracheal volume, ml           | 1.264                                                                                  | 0.041 | 0.999    | 0.408                    | 0.697                    | 1                 | 6.439                   | 0.023                   |
| Log head orifice, mm <sup>2</sup> | 0.607                                                                                  | 0.018 | 0.999    | 0.532                    | 0.614                    | 0.67              | 3.356                   | 0.078                   |
| Log head trachea, mm <sup>2</sup> | 0.750                                                                                  | 0.033 | 0.998    | 0.641                    | 0.545                    | 0.67              | 2.518                   | 0.128                   |
| Log leg orifice, mm <sup>2</sup>  | 0.721                                                                                  | 0.049 | 0.995    | 0.610                    | 0.564                    | 0.67              | 1.117                   | 0.380                   |
| Log leg trachea, mm <sup>2</sup>  | 1.016                                                                                  | 0.037 | 0.998    | 0.173                    | 0.868                    | 0.67              | 9.459                   | 0.011                   |

| <b>E</b>                          | Ordinary least-square regression analysis on species mean values without phylogenetic correction |       |          |                          |                          |                   |                         |                         |
|-----------------------------------|--------------------------------------------------------------------------------------------------|-------|----------|--------------------------|--------------------------|-------------------|-------------------------|-------------------------|
|                                   | Slope                                                                                            | SE    | <i>r</i> | <i>t</i> <sub>Comp</sub> | <i>p</i> <sub>Comp</sub> | SI <sub>Hyp</sub> | <i>t</i> <sub>Hyp</sub> | <i>p</i> <sub>Hyp</sub> |
| Log tracheal volume, ml           | 1.264                                                                                            | 0.040 | 0.999    | 0.416                    | 0.692                    | 1                 | 6.664                   | 0.022                   |
| Log head orifice, mm <sup>2</sup> | 0.606                                                                                            | 0.018 | 0.999    | 0.549                    | 0.603                    | 0.67              | 3.377                   | 0.078                   |
| Log head trachea, mm <sup>2</sup> | 0.748                                                                                            | 0.033 | 0.998    | 0.672                    | 0.526                    | 0.67              | 2.455                   | 0.134                   |
| Log leg orifice, mm <sup>2</sup>  | 0.718                                                                                            | 0.049 | 0.995    | 0.652                    | 0.539                    | 0.67              | 1.050                   | 0.404                   |
| Log leg trachea, mm <sup>2</sup>  | 1.034                                                                                            | 0.014 | 0.9998   | 0.374                    | 0.721                    | 0.67              | 25.63                   | 0.002                   |

| <b>F</b>                          | Standard major axis line-fit on all individual data points without phylogenetic correction |       |          |                          |                          |                   |                         |                         |
|-----------------------------------|--------------------------------------------------------------------------------------------|-------|----------|--------------------------|--------------------------|-------------------|-------------------------|-------------------------|
|                                   | Slope                                                                                      | SE    | <i>r</i> | <i>t</i> <sub>Comp</sub> | <i>p</i> <sub>Comp</sub> | SI <sub>Hyp</sub> | <i>t</i> <sub>Hyp</sub> | <i>p</i> <sub>Hyp</sub> |
| Log tracheal volume, ml           | 1.272                                                                                      | 0.017 | 0.997    | 0.414                    | 0.681                    | 1                 | 15.90                   | 0.004                   |
| Log head orifice, mm <sup>2</sup> | 0.611                                                                                      | 0.011 | 0.993    | 0.546                    | 0.588                    | 0.67              | 5.519                   | 0.031                   |
| Log head trachea, mm <sup>2</sup> | 0.755                                                                                      | 0.013 | 0.995    | 0.761                    | 0.451                    | 0.67              | 6.596                   | 0.022                   |
| Log leg orifice, mm <sup>2</sup>  | 0.731                                                                                      | 0.015 | 0.992    | 0.689                    | 0.495                    | 0.67              | 3.908                   | 0.060                   |
| Log leg trachea, mm <sup>2</sup>  | 1.042                                                                                      | 0.013 | 0.997    | 0.566                    | 0.575                    | 0.67              | 28.70                   | 0.001                   |

Comparison of slopes from two different line-fit analyses with or without phylogenetic correction on species means and individual values. Standard major axis (1) line-fit on phylogenetically independent contrasts (2). Phylogenetic correction to minimize variance of independent contrasts is based on the combination of two phylogenetic trees with branch lengths normalized by tree length (figure 49 in ref. 3; ref. 4). SE, standard error of slope; *r*, Pearson's correlation coefficient; SI<sub>Hyp</sub>, hypothetical slope for the null hypothesis of isometry); *t*<sub>Hyp</sub>, *t* value for comparison of actual and hypothetical slope (5); *p*<sub>Hyp</sub>, probability of equal slopes (significance level is 0.05); *t*<sub>Comp</sub>, *t* value of slopes compared between this line-fit analysis and analysis from Table 1; *p*<sub>Comp</sub>, error probability for equal slopes.

1. Warton DI, Wright IJ, Falster DS, Westoby M (2006) *Biol Rev* 81:259-291.
2. Garland T, Jr, Harvey PH, Ives AR (1992) *Syst Biol* 41:18-32.
3. Doyen JT, Tschinkel WR (1982) *Syst Entomol* 7:127-183.
4. Mestrovic N, Mravinac B, Plohl M, Ugarkovic D, Bruvo-Madaric B (2006) *Eur J Entomol* 103:709-715.
5. Zar JH (1999) *Biostatistical Analysis* (Prentice Hall, Upper Saddle River, NJ).
